# Supplementary material
Source: PubMed Central journal article supplement (PMC3215833)

## Supplemental Table

### The mRNA Expression of Adipogenic, Lipogenic, Lipolytic, and Lipid Recycling Genes in Inguinal Adipose Tissue

| Transcripts                 | WT              | <i>Ghsr</i> <sup>-/-</sup> | <i>P</i> Value   |
|-----------------------------|-----------------|----------------------------|------------------|
| <b>Adipogenic</b>           |                 |                            |                  |
| PPAR $\gamma$ 2             | 1.00 $\pm$ 0.16 | 0.56 $\pm$ 0.16            | <b>&lt;0.001</b> |
| <b>Glucose/Lipid Uptake</b> |                 |                            |                  |
| Lipoprotein lipase          | 1.00 $\pm$ 0.16 | 0.68 $\pm$ 0.17            | <b>&lt;0.05</b>  |
| CD36                        | 1.00 $\pm$ 0.14 | 0.34 $\pm$ 0.10            | <b>&lt;0.001</b> |
| <b>Lipogenic</b>            |                 |                            |                  |
| aP2                         | 1.00 $\pm$ 0.15 | 0.55 $\pm$ 0.10            | <b>&lt;0.001</b> |
| Lipin 1                     | 1.00 $\pm$ 0.12 | 0.75 $\pm$ 0.18            | 0.12             |
| <b>Lipid Utilization</b>    |                 |                            |                  |
| UCP2                        | 1.00 $\pm$ 0.15 | 0.62 $\pm$ 0.10            | <b>&lt;0.01</b>  |
| <b>Lipolytic</b>            |                 |                            |                  |
| Perilipin                   | 1.00 $\pm$ 0.19 | 0.68 $\pm$ 0.17            | 0.07             |
| Hormone-sensitive lipase    | 1.00 $\pm$ 0.19 | 0.72 $\pm$ 0.19            | 0.13             |

Values shown are mean  $\pm$  SEM (n = 9). The age of the mice ranges from 20 months to 24 months.

**Fig. S1**

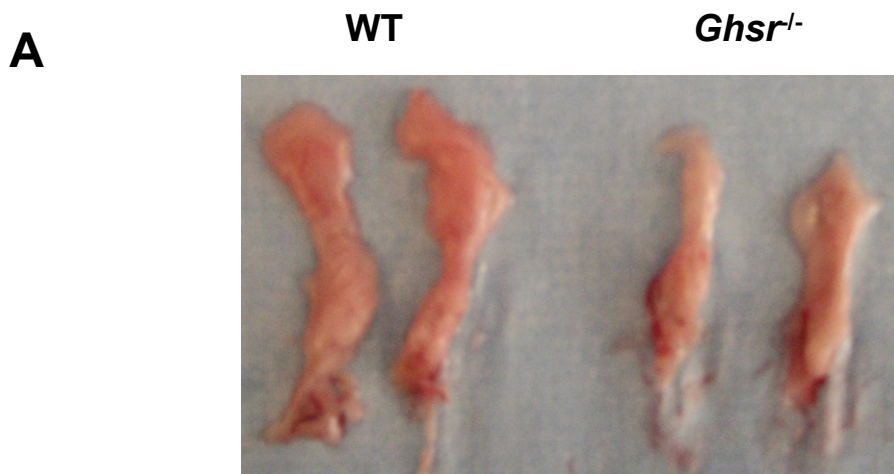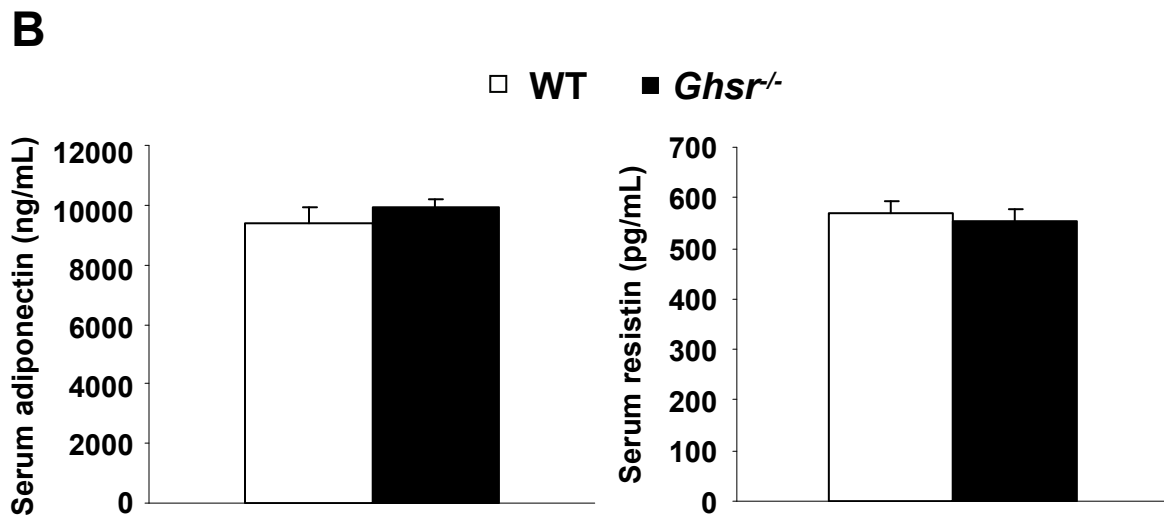

**Fig. S2**

**A**

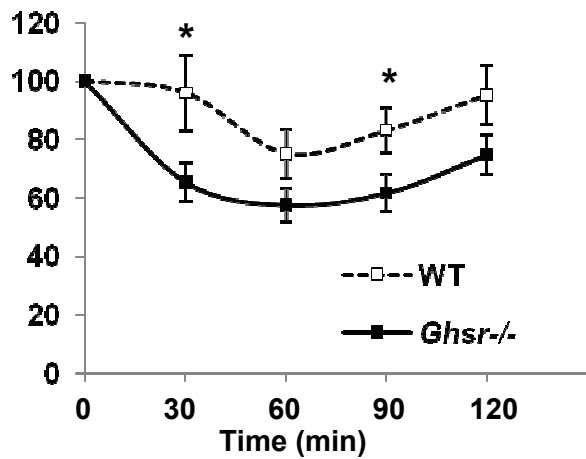

**B**

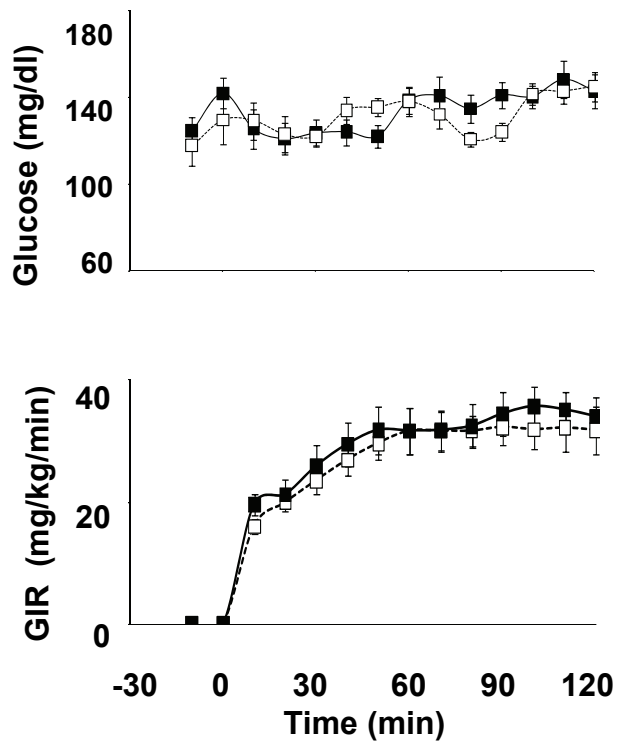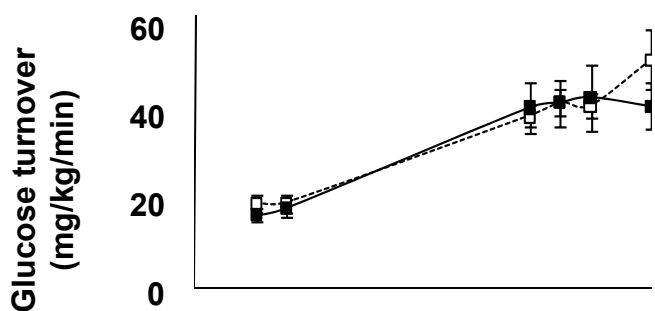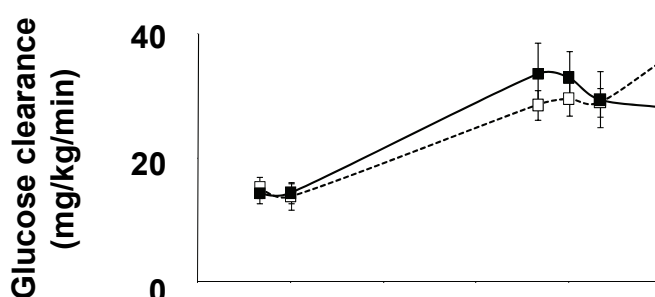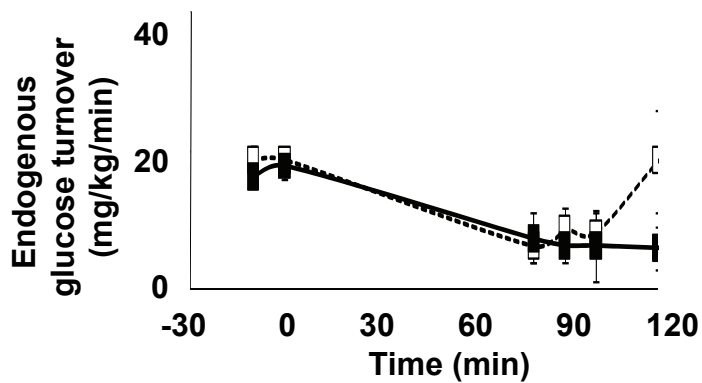

Fig. S3

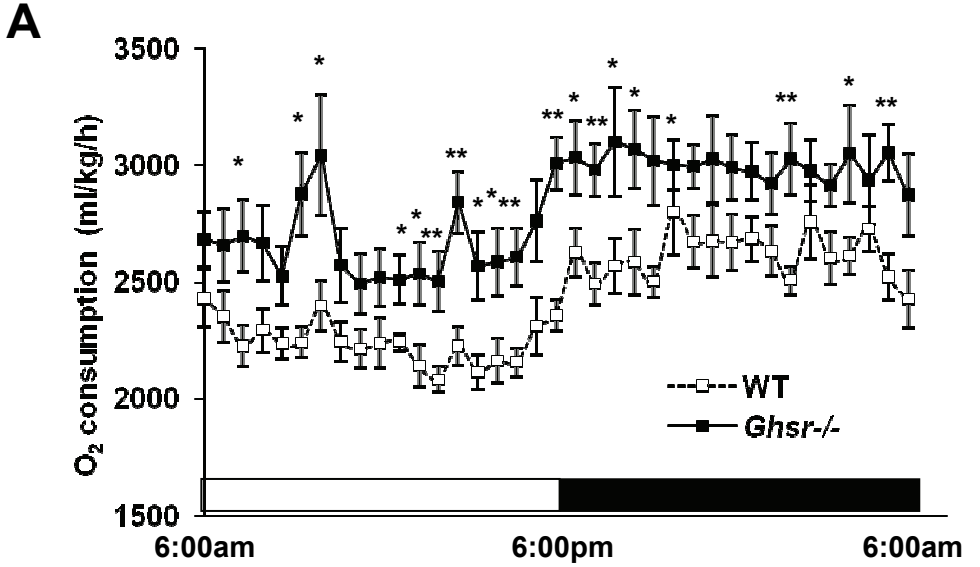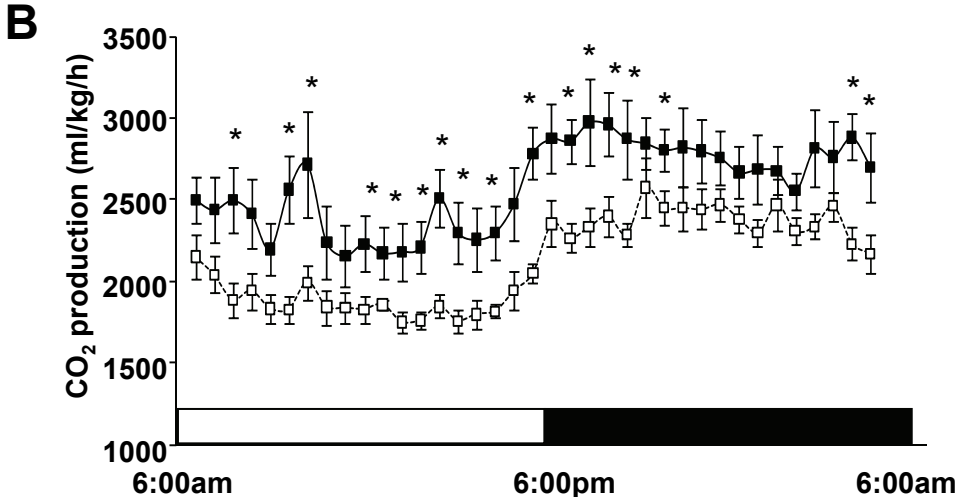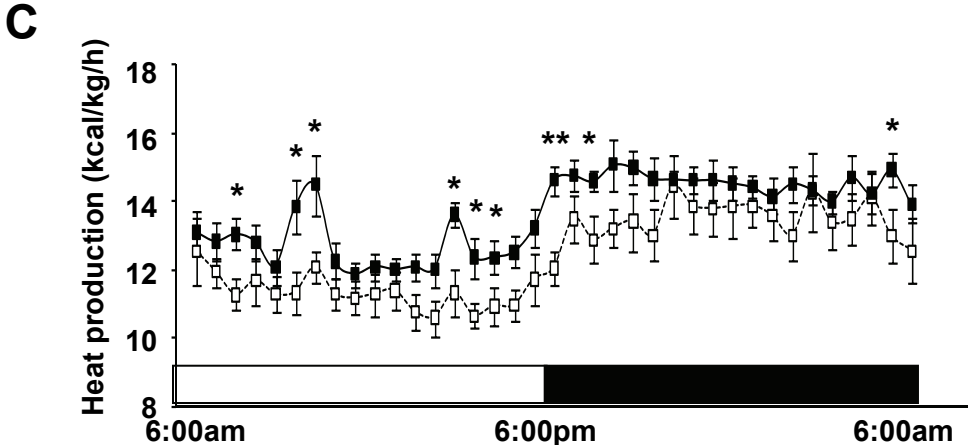

**Fig. S4**

**A**

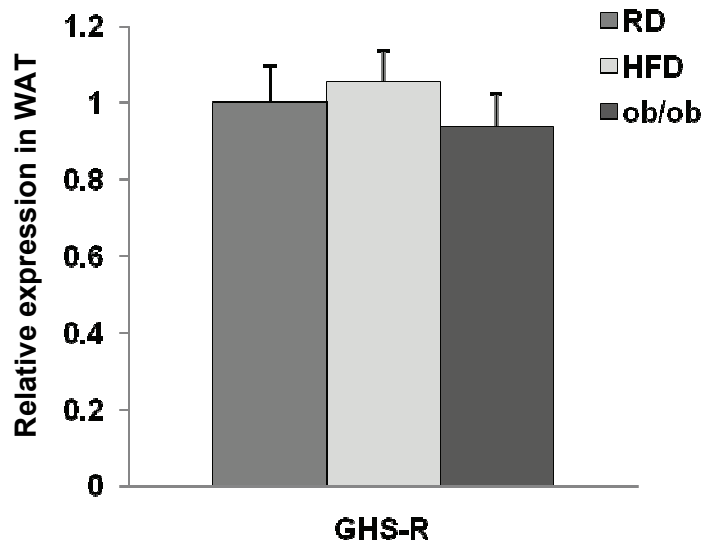

**B**

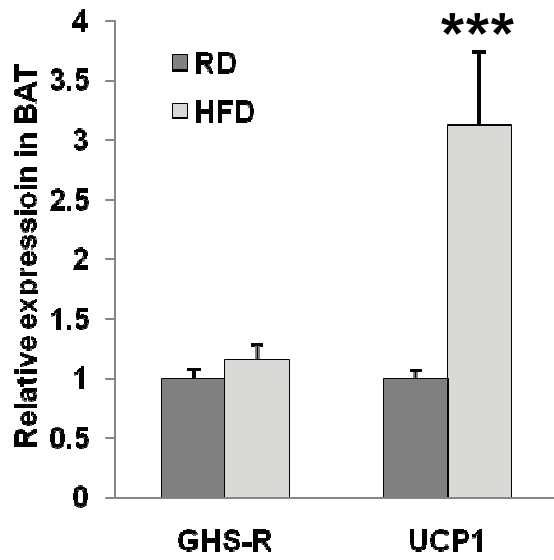

**Fig. S5**

**WT**

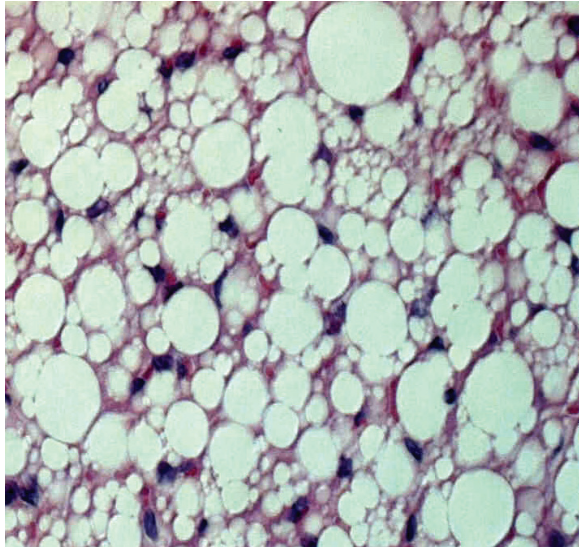

***Ghsr*<sup>-/-</sup>**

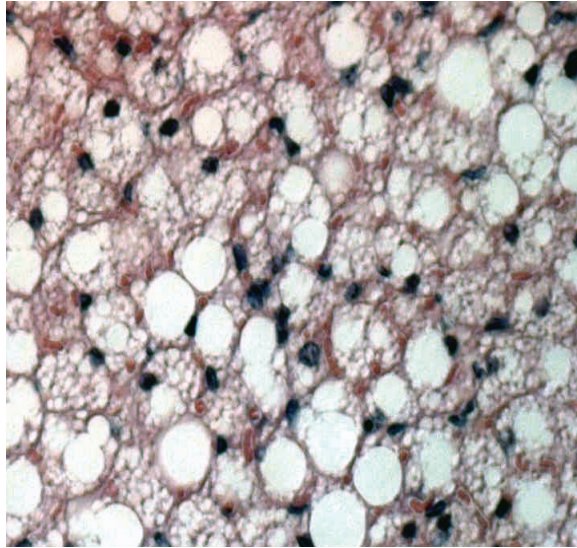

**Fig. S6**

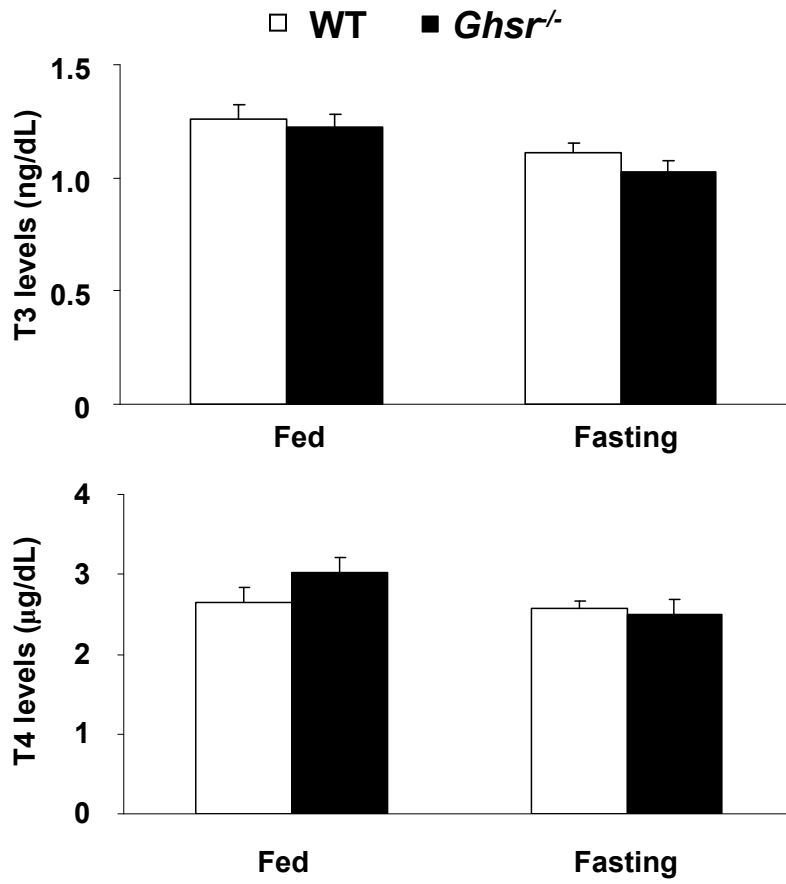

Supplement: NIHMS320923-supplement-Supp_Table_S1___Fig_S1-_S6.pdf [file NIHMS320923-supplement-Supp_Table_S1___Fig_S1-_S6.pdf]
